# Supplementary material for: Green Investor Shareholding and Financial Distress Risk of Manufacturing Companies: Exacerbate or Mitigate?
Source: Research Square preprint supplement (doi:10.21203/rs.3.rs-6390011/v1), 2025-06-19
Supplement: Supplementary file 1 [file 8c9a9665fc95958460870c76.docx]

Supplementary files

**Table S1** Balance Tests

| ***Panel A:*** *Regression results before PSM.* | | | | | | | | | | | |
| --- | --- | --- | --- | --- | --- | --- | --- | --- | --- | --- | --- |
| Variables | (1) | (2) | (3) | (4) | (5) | (6) | (7) | (8) | (9) | (10) | (11) |
| 2012b | 2013b | 2014b | 2015b | 2016b | 2017b | 2018b | 2019b | 2020b | 2021b | 2022b |
| Size | 0.5322*** | 0.5214*** | 0.5432*** | 0.1757*** | 0.6112*** | 0.6964*** | 0.8680*** | 1.1405*** | 1.1105*** | 0.8483*** | 0.9118*** |
|  | (4.86) | (4.88) | (6.54) | (2.76) | (8.97) | (10.37) | (12.63) | (14.85) | (15.03) | (12.90) | (13.79) |
| Lev | -2.7530*** | -1.8948*** | -1.0401** | 0.1073 | -0.3383 | -0.1070 | -0.9739*** | -1.8229*** | -1.9150*** | -0.6662** | -0.7485*** |
|  | (-4.25) | (-3.18) | (-2.47) | (0.34) | (-1.07) | (-0.35) | (-3.13) | (-5.45) | (-5.78) | (-2.39) | (-2.74) |
| Age | 0.0742 | -0.0809 | -0.3223*** | -0.1033 | -0.2707*** | -0.5136*** | -0.6894*** | -1.1994*** | -1.4545*** | -0.8739*** | -1.0149*** |
|  | (0.55) | (-0.55) | (-3.25) | (-1.41) | (-3.59) | (-7.27) | (-8.55) | (-13.32) | (-17.38) | (-11.06) | (-11.49) |
| Shr3 | -0.6938 | -0.5507 | -1.2453*** | -1.4258*** | -1.5471*** | -0.9247** | -1.3550*** | -1.4770*** | -2.2476*** | -0.0165*** | -0.0217*** |
|  | (-1.18) | (-0.86) | (-2.59) | (-3.64) | (-4.00) | (-2.47) | (-3.55) | (-3.89) | (-6.27) | (-4.92) | (-6.50) |
| Indep | -0.1552 | 2.5853** | -0.7337 | 2.3162*** | 1.0291 | 1.0066* | -0.3979 | -0.4782 | 0.3423 | -1.2343 | -0.9634 |
|  | (-0.12) | (2.56) | (-0.88) | (3.45) | (1.46) | (1.94) | (-1.09) | (-0.74) | (0.57) | (-1.13) | (-0.89) |
| Board | -0.0254 | -0.6906* | -0.4035 | -0.0560 | -0.2196 | 0.0544 | 0.3559* | -0.2839 | -0.3433 | -0.3615 | -0.4980 |
|  | (-0.06) | (-1.77) | (-1.42) | (-0.24) | (-0.89) | (0.23) | (1.94) | (-1.27) | (-1.64) | (-0.96) | (-1.36) |
| Msalary | 26.2147*** | 23.4072*** | 13.8220*** | 12.2386*** | 6.1039 | 17.1998*** | 16.8756*** | 15.5708*** | 17.8931*** | 8.4193*** | 8.1828*** |
|  | (4.02) | (3.80) | (3.07) | (3.40) | (1.64) | (4.61) | (5.07) | (5.36) | (6.30) | (4.31) | (4.23) |
| GDPgrow | 6.1533* | 1.8674 | 5.0611 | 5.4929** | 8.0475*** | 4.9115*** | 8.5604*** | 2.1123*** | -2.1423 | -0.5968 | -0.7343 |
|  | (1.86) | (0.41) | (1.39) | (2.37) | (3.92) | (2.70) | (3.02) | (2.72) | (-0.67) | (-0.27) | (-0.31) |
| Pseudo R2 | 0.0937 | 0.0940 | 0.0634 | 0.0303 | 0.0699 | 0.0975 | 0.1360 | 0.1889 | 0.2236 | 0.1257 | 0.1400 |
| ***Panel B:*** *Regression results after PSM.* | | | | | | | | | | | |
| Variables | (1) | (2) | (3) | (4) | (5) | (6) | (7) | (8) | (9) | (10) | (11) |
| 2012a | 2013a | 2014a | 2015a | 2016a | 2017a | 2018a | 2019a | 2020a | 2021a | 2022a |
| Size | 0.1462 | -0.0101 | -0.1079 | -0.0627 | -0.0547 | 0.0028 | -0.0109 | 0.0484 | -0.0420 | -0.0645 | -0.0003 |
|  | (0.88) | (-0.07) | (-0.86) | (-0.66) | (-0.57) | (0.03) | (-0.11) | (0.45) | (-0.43) | (-0.77) | (-0.00) |
| Lev | 0.5351 | 0.0099 | -0.2115 | 0.0728 | 0.1585 | 0.0589 | 0.0837 | -0.2936 | 0.1244 | -0.0884 | -0.0802 |
|  | (0.60) | (0.01) | (-0.34) | (0.15) | (0.33) | (0.12) | (0.18) | (-0.60) | (0.26) | (-0.22) | (-0.21) |
| Age | -0.4004* | 0.0597 | 0.3749* | 0.0142 | 0.0894 | -0.0530 | 0.0453 | 0.0055 | 0.0983 | 0.0286 | 0.0274 |
|  | (-1.71) | (0.28) | (1.87) | (0.10) | (0.74) | (-0.42) | (0.37) | (0.04) | (0.74) | (0.28) | (0.24) |
| Shr3 | -1.0392 | -0.8039 | 0.3768 | 0.6544 | 0.7333 | 0.4069 | 0.2733 | -0.4921 | 0.2621 | 0.0025 | 0.0014 |
|  | (-0.97) | (-0.97) | (0.53) | (1.14) | (1.28) | (0.71) | (0.51) | (-0.90) | (0.50) | (0.54) | (0.31) |
| Indep | -3.8864* | -1.1105 | -0.4591 | 0.2954 | -0.0032 | -0.6629 | 0.1258 | -0.1005 | -1.7379** | -0.1549 | 0.0574 |
|  | (-1.87) | (-0.74) | (-0.38) | (0.30) | (-0.00) | (-0.65) | (0.23) | (-0.11) | (-1.96) | (-0.12) | (0.04) |
| Board | -1.0306 | -0.3255 | -0.1396 | 0.3424 | -0.2690 | -0.5234 | -0.0242 | 0.0046 | -0.2053 | -0.0593 | -0.1552 |
|  | (-1.43) | (-0.66) | (-0.32) | (0.96) | (-0.74) | (-1.35) | (-0.09) | (0.01) | (-0.63) | (-0.13) | (-0.32) |
| Msalary | 1.4182 | 2.5634 | 2.2123 | 3.5835 | 0.0911 | -2.2159 | -2.6534 | -3.6202 | -0.6453 | 2.7583 | -0.5104 |
|  | (0.15) | (0.41) | (0.37) | (0.80) | (0.02) | (-0.43) | (-0.69) | (-1.03) | (-0.19) | (1.13) | (-0.22) |
| GDPgrow | -0.7640 | -5.0255 | -5.7762 | -3.6441 | 0.1127 | 0.2629 | -0.2963 | -0.4635 | 1.3973 | 2.2878 | 1.8539 |
|  | (-0.15) | (-0.72) | (-0.95) | (-1.03) | (0.04) | (0.10) | (-0.08) | (-0.42) | (0.35) | (0.71) | (0.56) |
| Pseudo R2 | 0.0262 | 0.0084 | 0.0081 | 0.0041 | 0.0024 | 0.0036 | 0.0008 | 0.0024 | 0.0042 | 0.0005 | 0.0937 |

Table S1 indicates that, after matching, the coefficient values of most matching variables in the regressions for each year decrease, with many coefficients becoming statistically insignificant, and the pseudo-R2 values of all regressions decrease significantly. These results suggest that there is no systematic bias in the matching variables between the two groups across different years, thereby meeting the requirements of the balance test.
